# Supplementary material for: Epilepsy-Induced High Affinity Blockade of the Cardiac Sodium Current INa by Lamotrigine; A Potential for Acquired Arrythmias
Source: MDPI journal article supplement (doi:10.3390/ph15101208), 2022-09-29
Supplement: s1 [file s1]

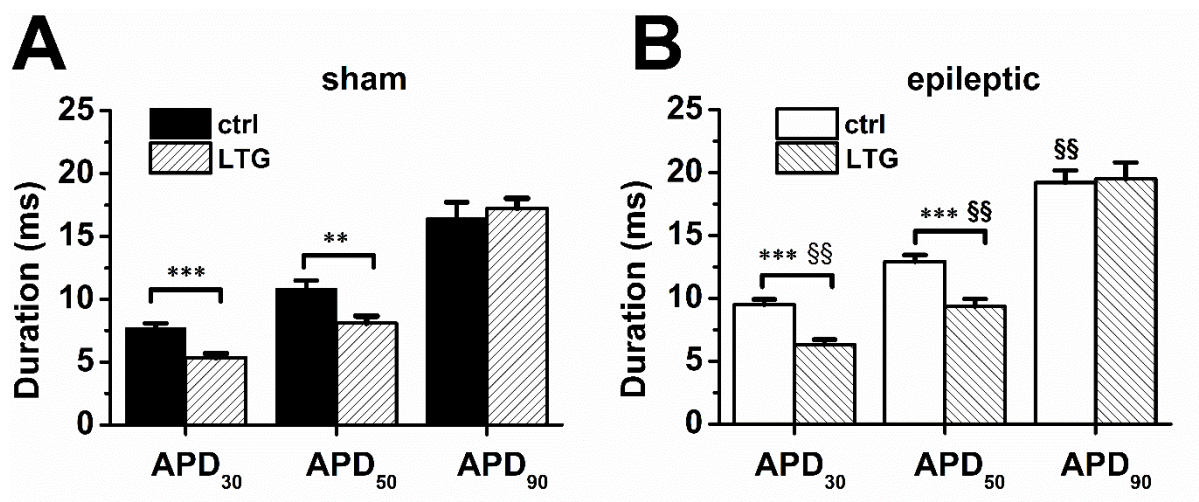

**Figure S1.** LTG decreased cardiac action potential duration (APD) at 30% and 50% of repolarization. (A,B) Action potential duration at 30% (APD<sub>30</sub>), 50% (APD<sub>50</sub>) and 90% (APD<sub>90</sub>) of repolarization, from sham and epileptic rat cardiomyocytes in control conditions and after perfusion with LTG (1 μmol/L). Bars indicate average value (± SEM). Tukey test using ANOVA one way. \*\*indicates  $p < 0.01$  and \*\*\*indicates  $p < 0.001$  (ctrl vs. LTG). §§ indicates  $p < 0.01$  (sham vs. epileptic). Number of animals: 3/group (ctrl and LTG). Number of cells: Sham (ctrl, LTG): 21, 12. Epileptic (ctrl, LTG): 12, 16.

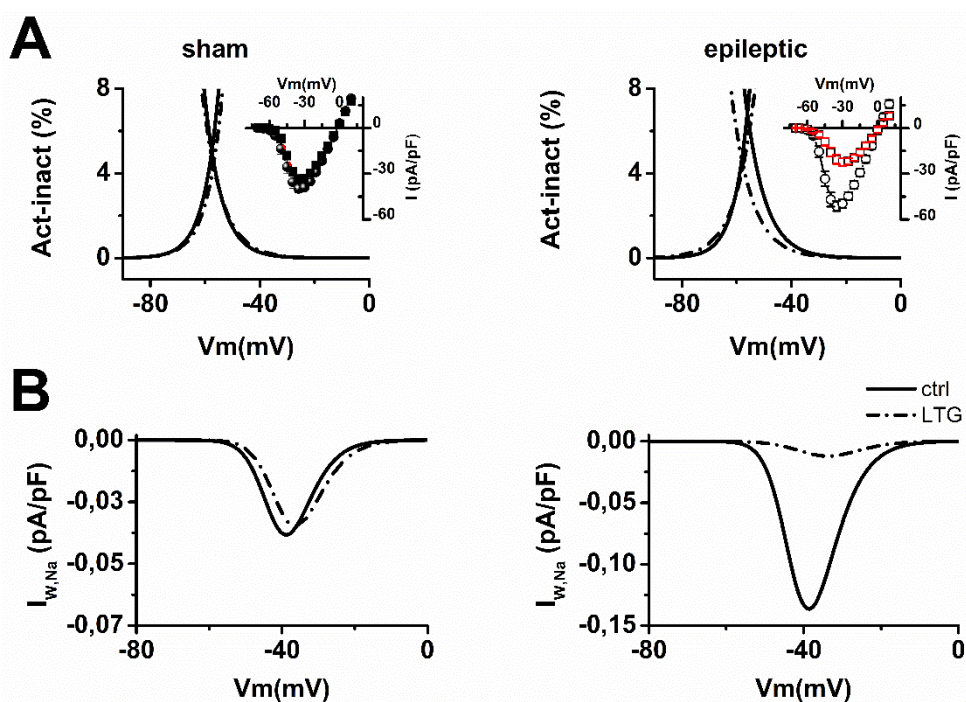

**Figure S2.** Sodium window current ( $I_{w,Na}$ ) was flattened by LTG during epilepsy. (A) Activation-inactivation curves of  $I_{Na}$  for sham and epileptic in control (ctrl) and in presence of LTG (10 μmol/L). Figure insets show the current-voltage relations comparison for control (circles) and LTG (squares). Number of cells: Sham (ctrl, LTG): 13, 14. Epilepsy (ctrl, LTG): 14, 13. (B) Window current calculated from the overlap of activation and inactivation curves showed in (A) and using the standard Hodgkin-Huxley formalism.
